# Supplementary material
Source: PubMed Central journal article supplement (PMC419985)

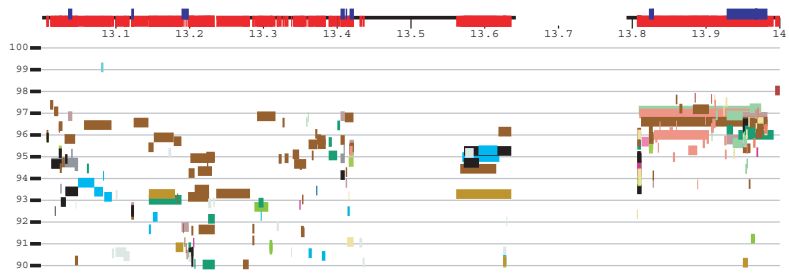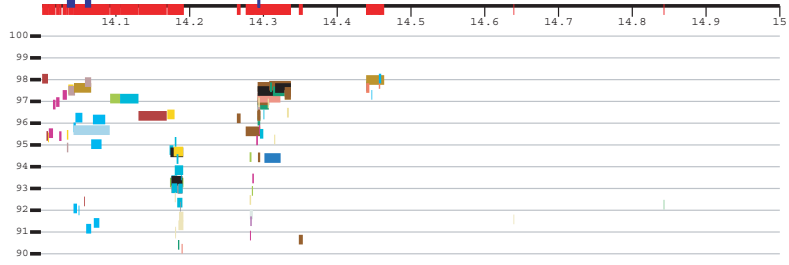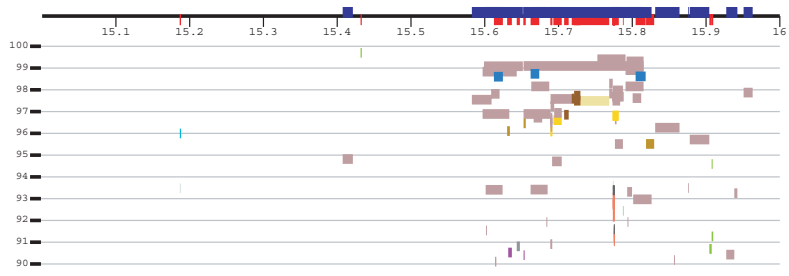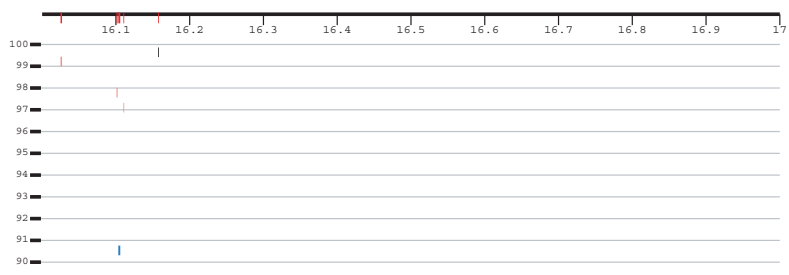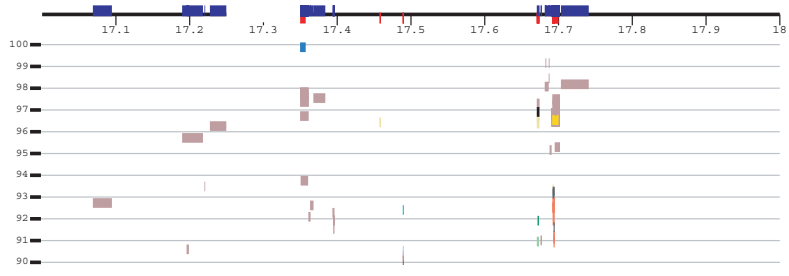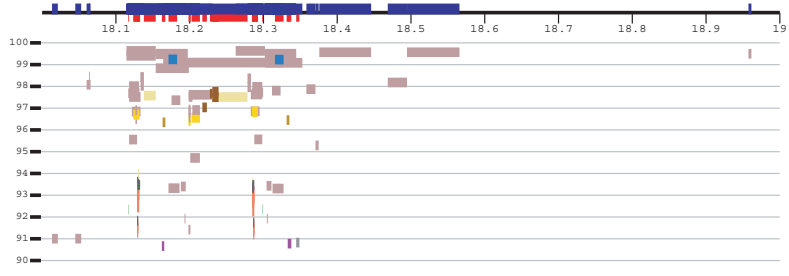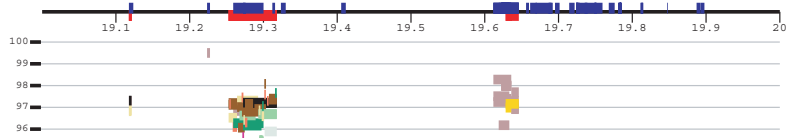

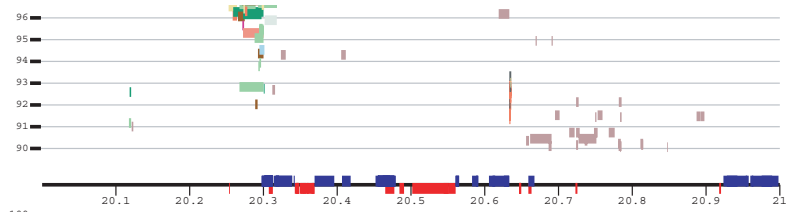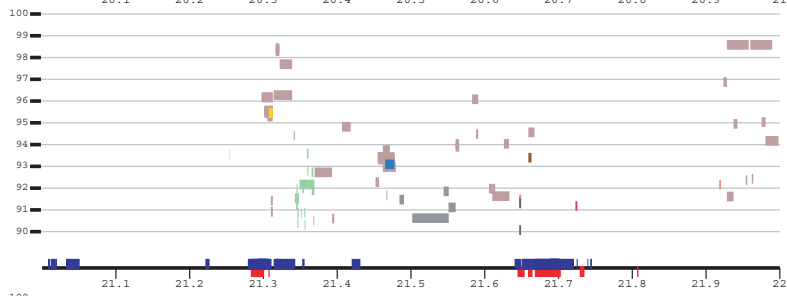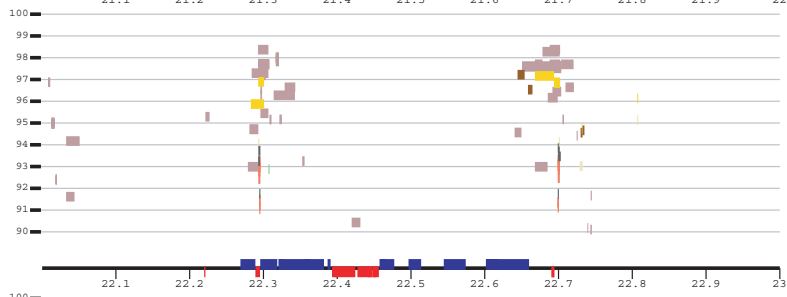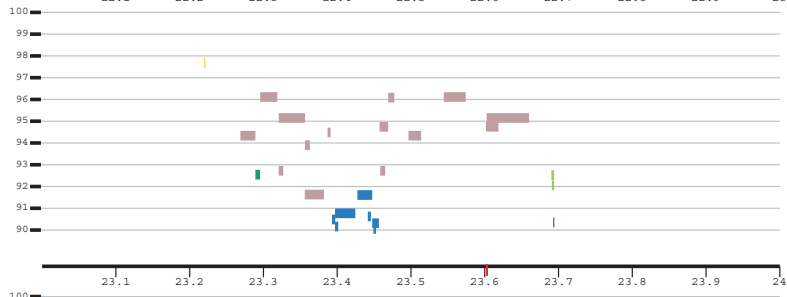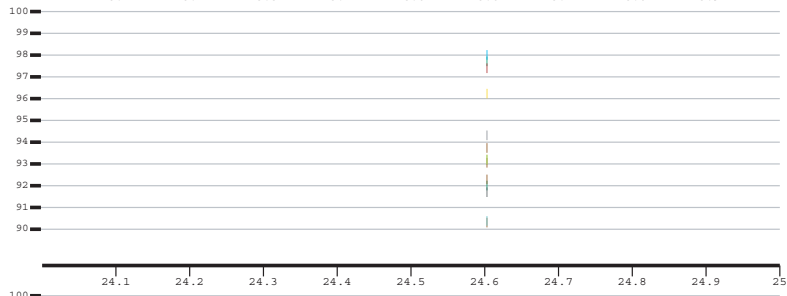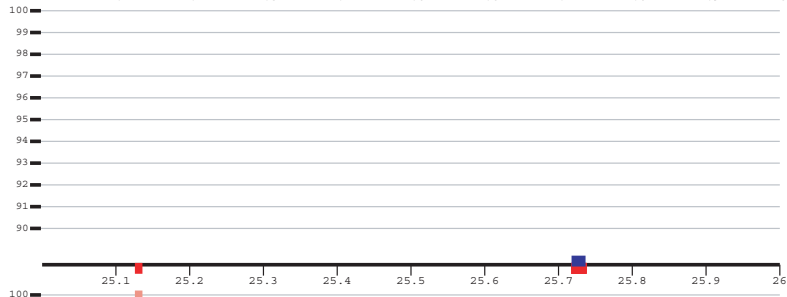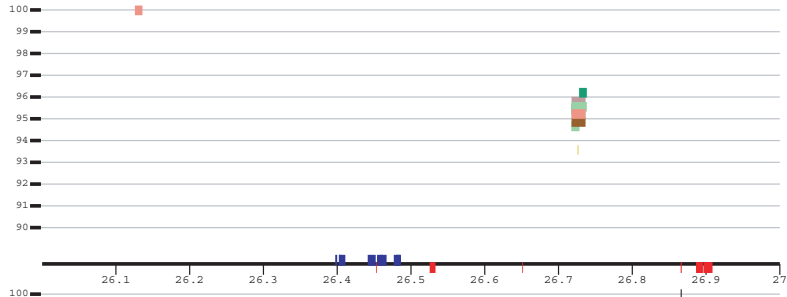

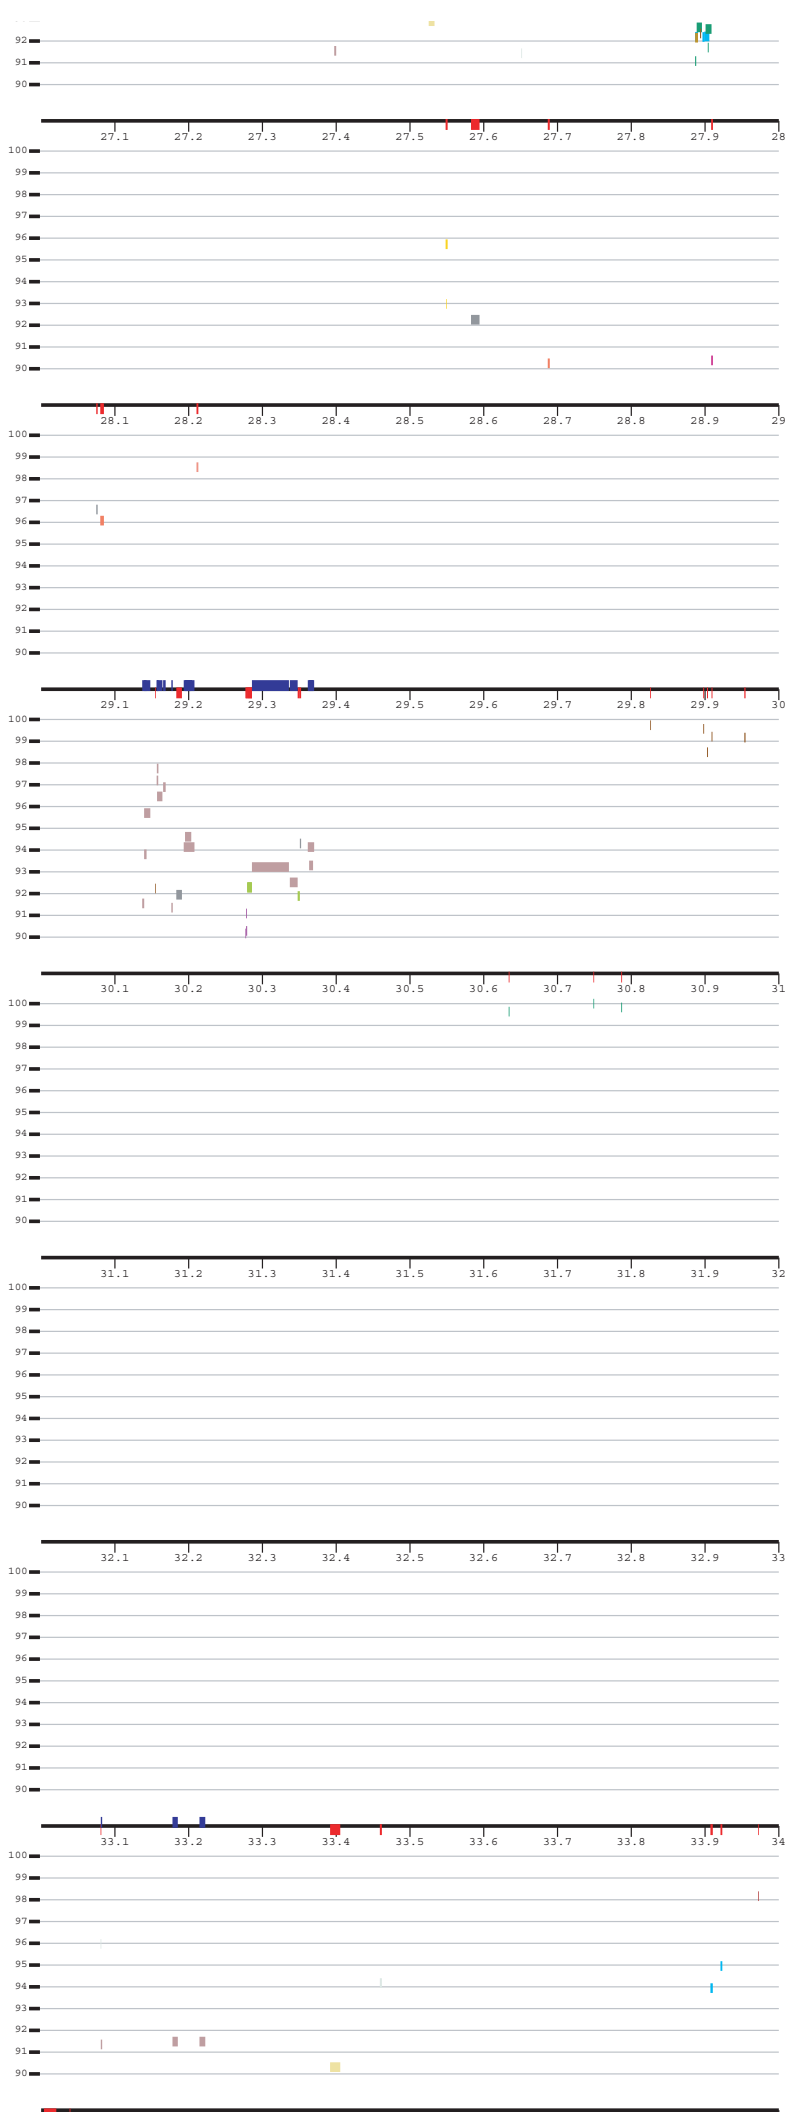

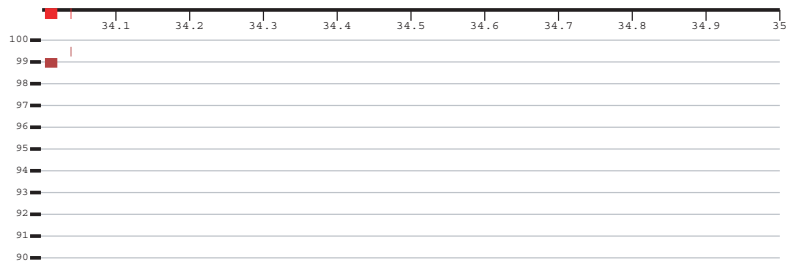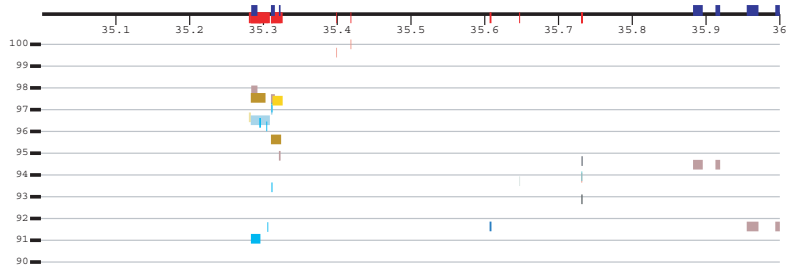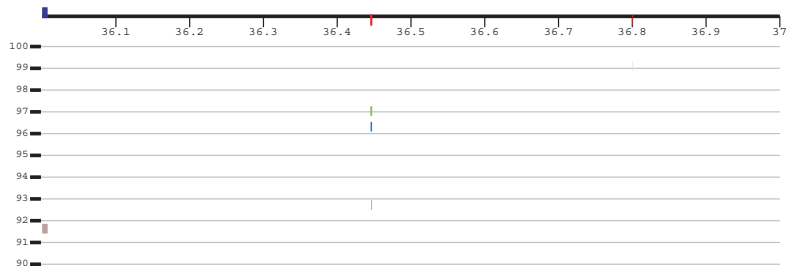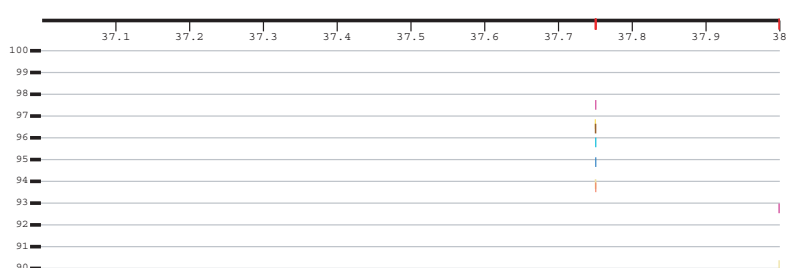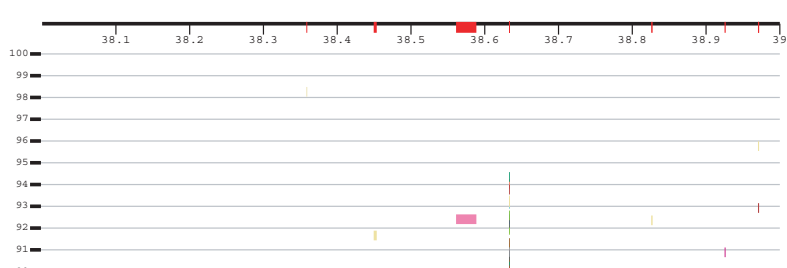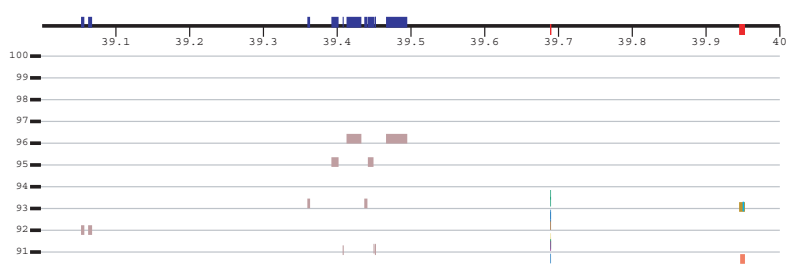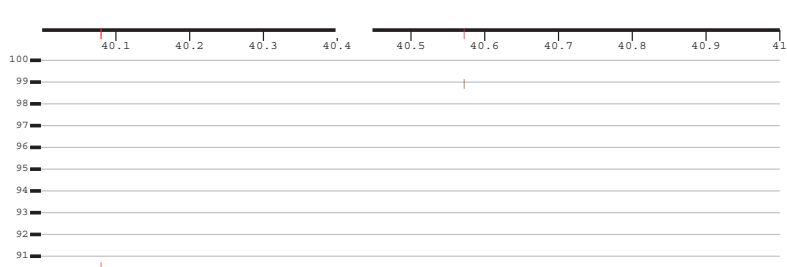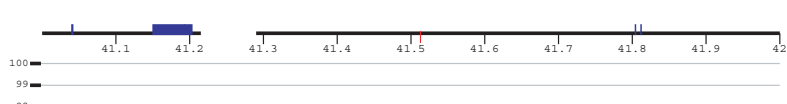

Supplement: doc1.pdf [file doc1.pdf]

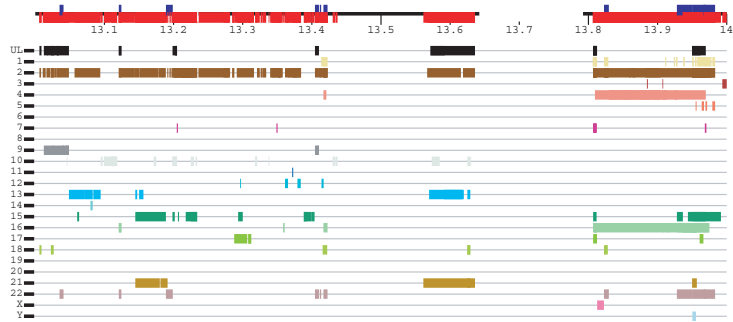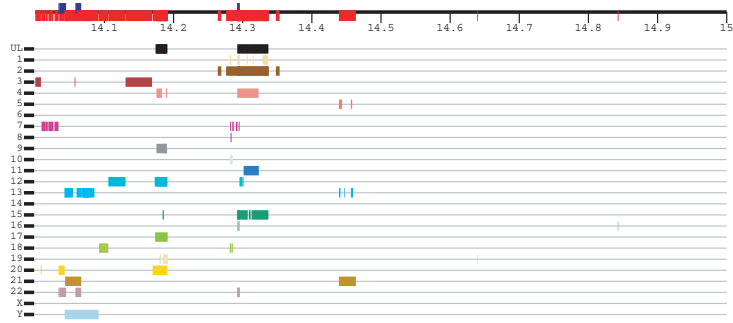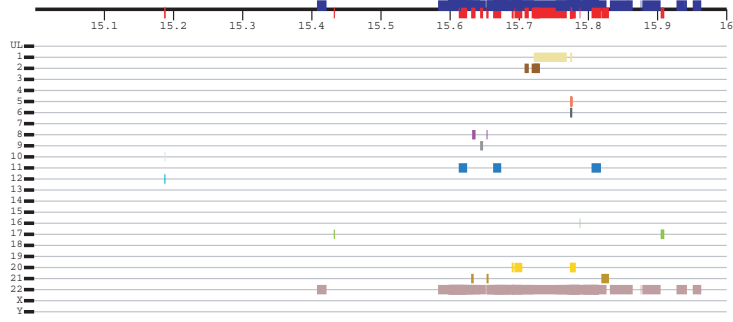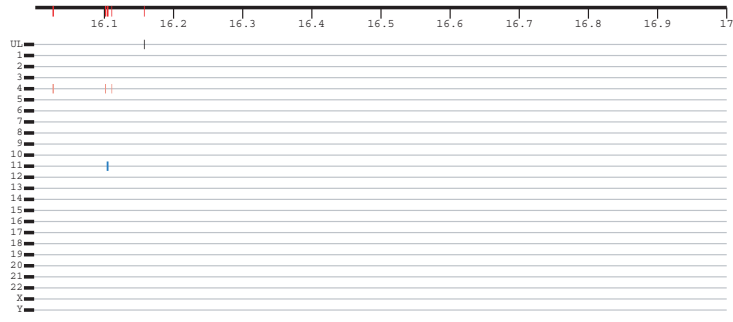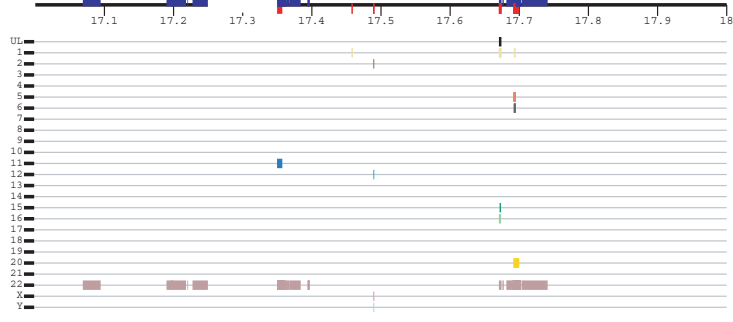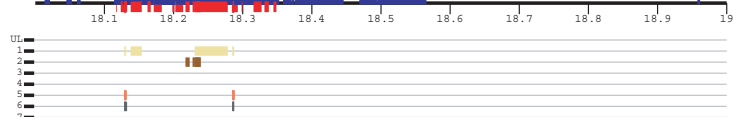

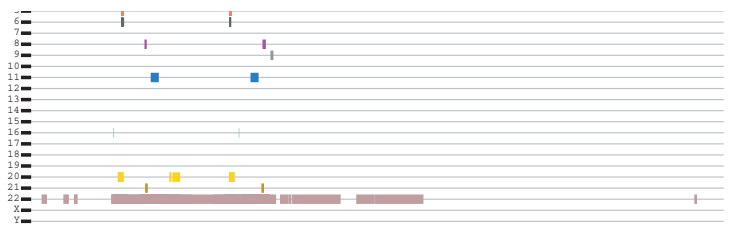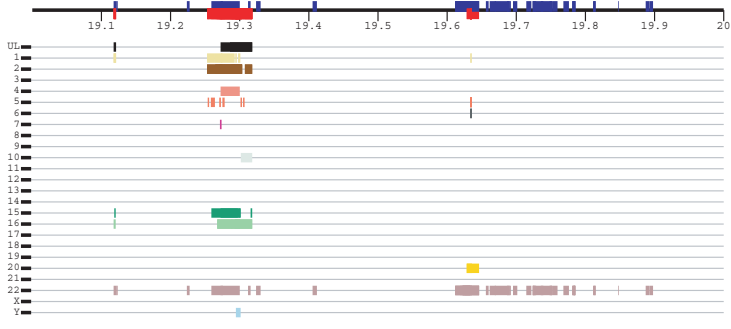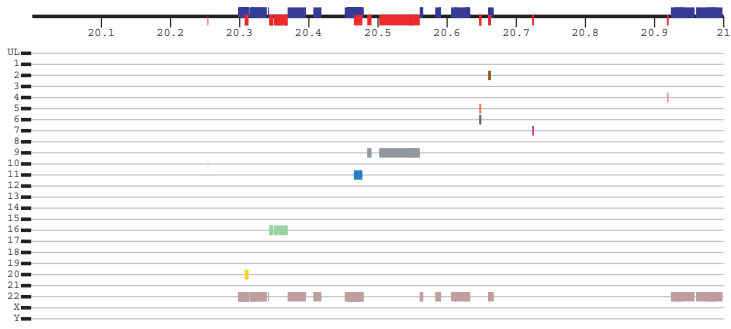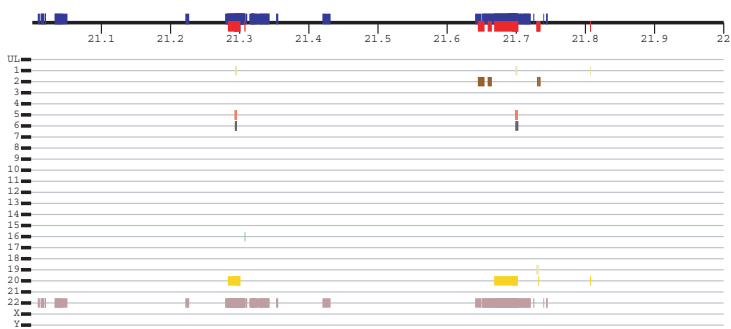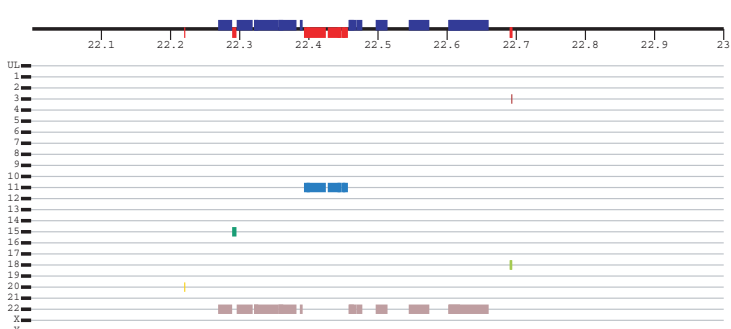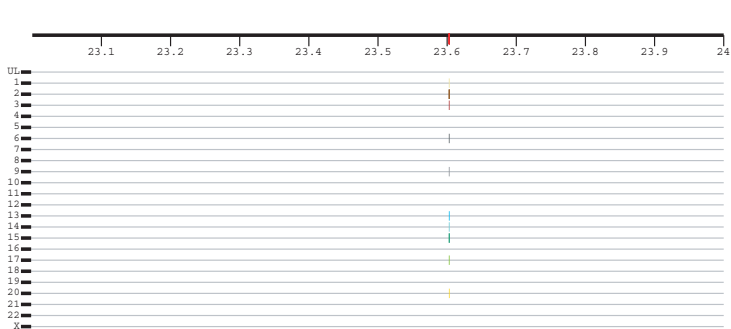

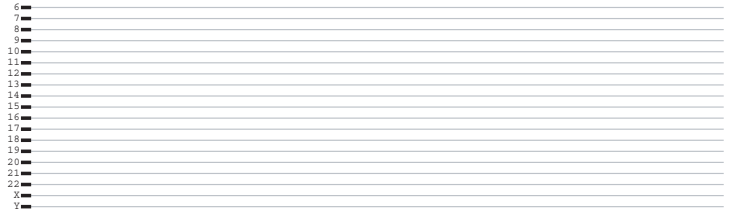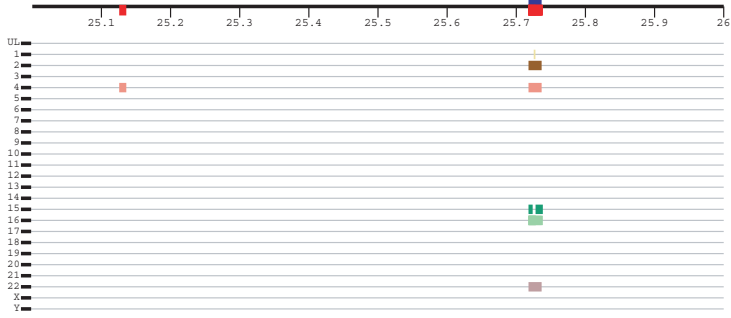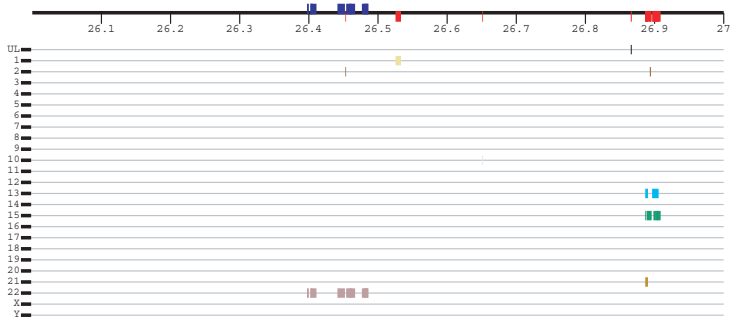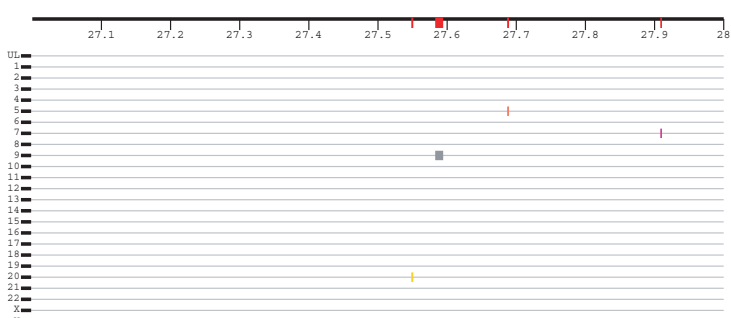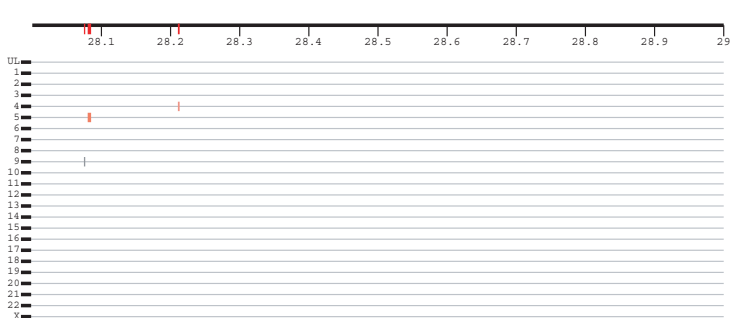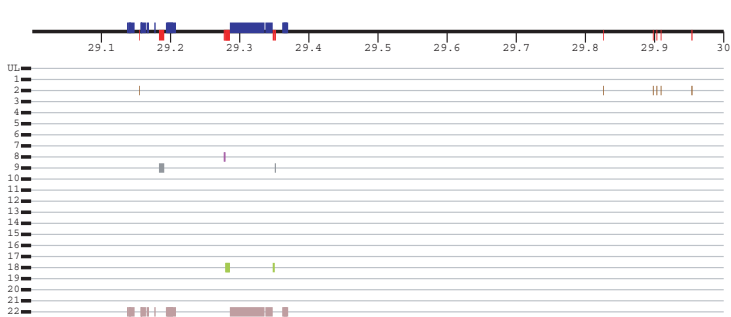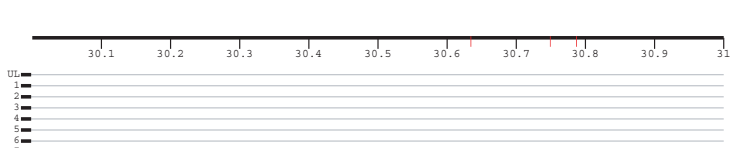

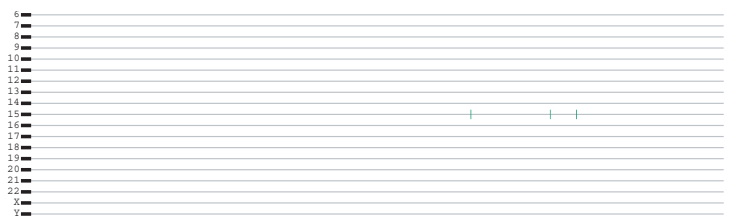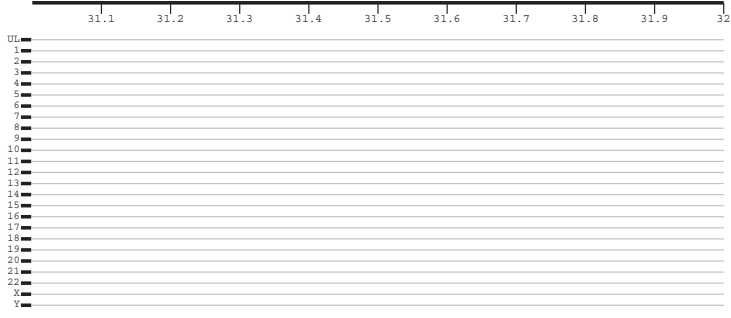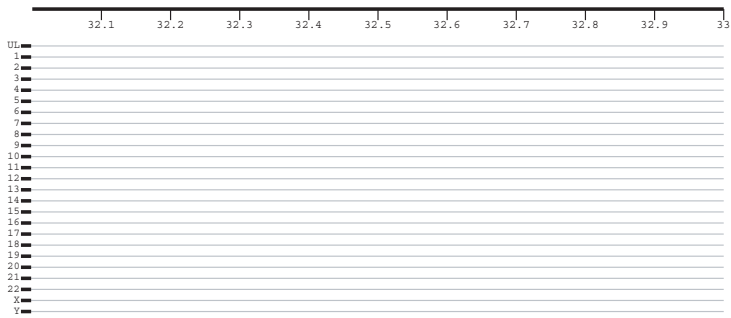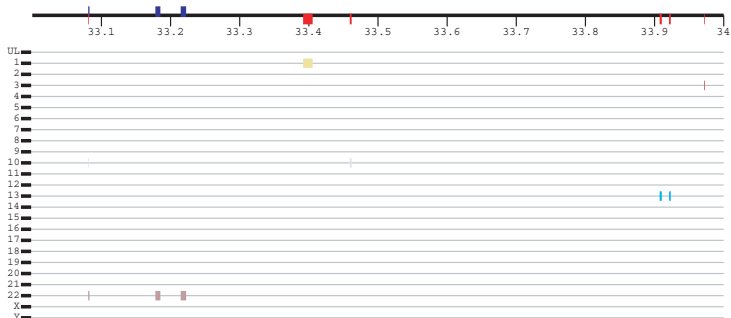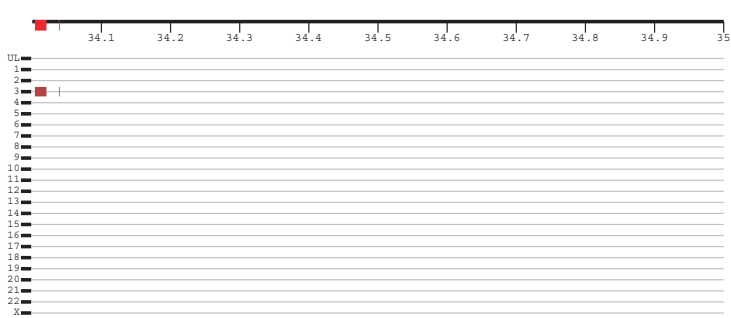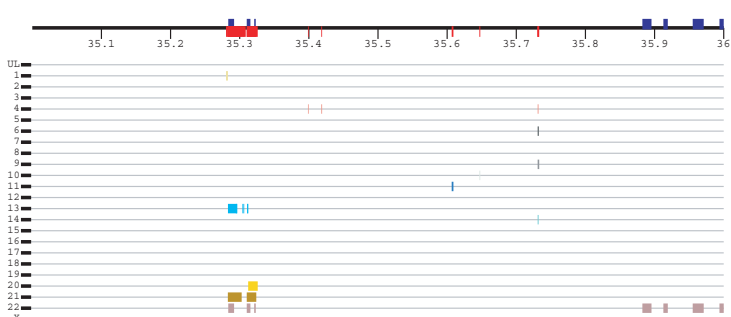

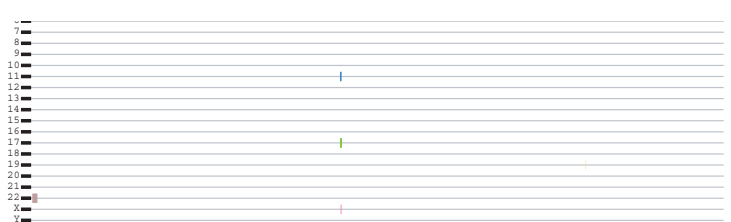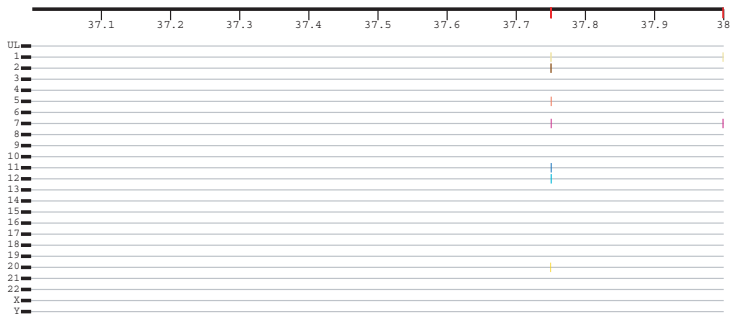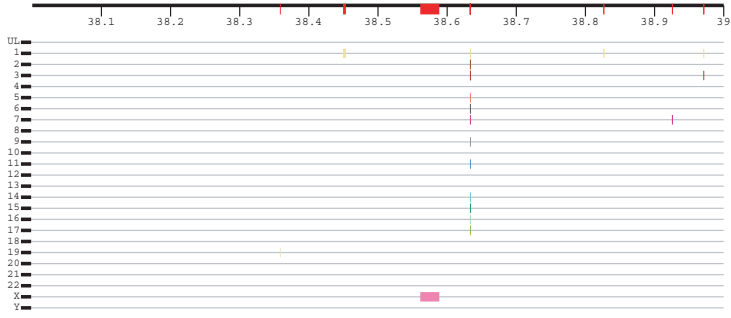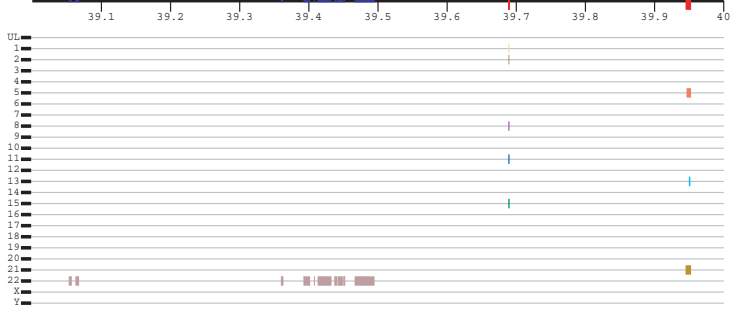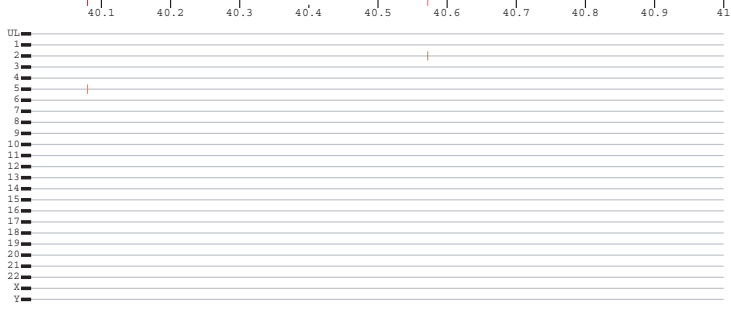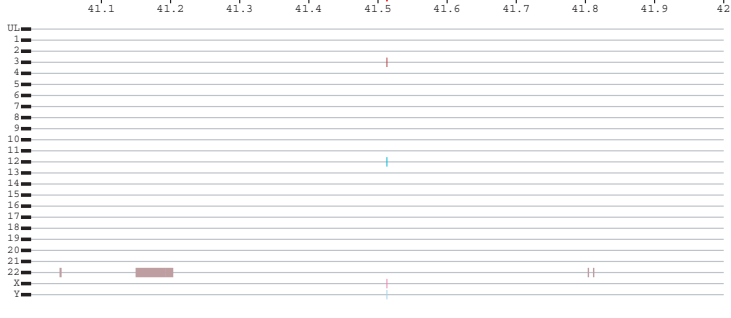

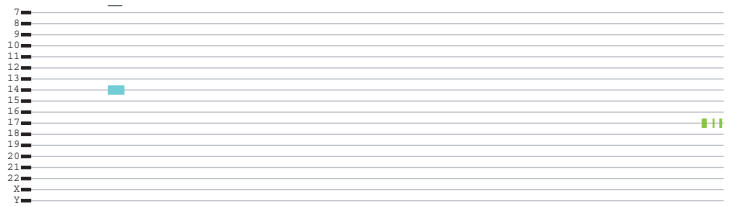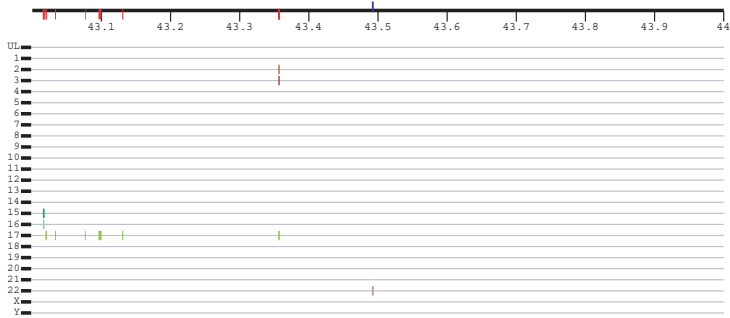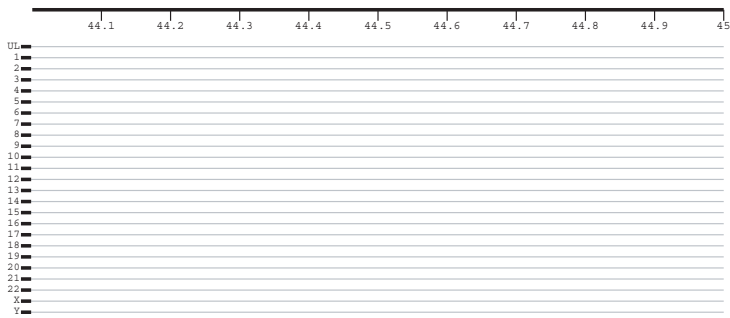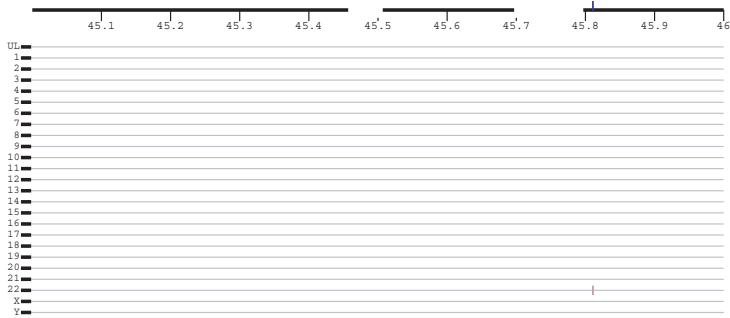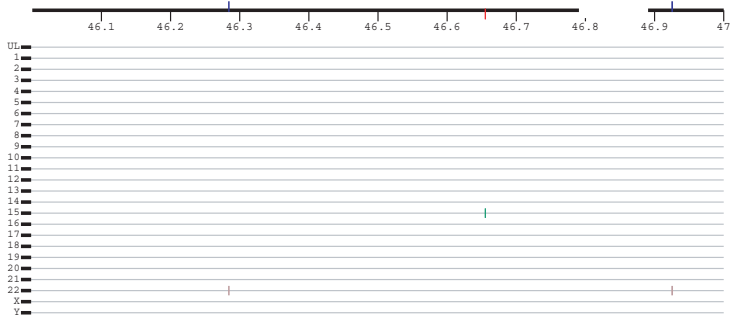

Supplement: doc2.pdf [file doc2.pdf]
